# Supplementary material for: Eftilagimod alpha, a soluble lymphocyte activation gene-3 (LAG-3) protein plus pembrolizumab in patients with metastatic melanoma
Source: PubMed Central journal article supplement — J Immunother Cancer. 2020 Nov 20;8(2):e001681. doi: 10.1136/jitc-2020-001681 (PMC7682474; doi:10.1136/jitc-2020-001681), 2020-11-20
Supplement: jitc-2020-001681supp002.pdf [file jitc-2020-001681supp002.pdf]

### Suppl. Material and Method

EDTA-whole blood samples were collected at Cycle 1, Cycle 5, Cycle 9 and Cycle 13 (in Part B only) prior to treatment (therefore two weeks after the previous dosing) and EOT. Direct blood staining with BD Multitest™ 6-Color TBNK (FITC-labeled CD3, clone SK7; PE-labeled CD16, clone B73.1, and PE-labeled CD56, clone NCAM16.2; PerCP-Cy5.5-labeled CD45, clone 2D1; PE-Cy7-labeled CD4, clone SK3; APC-labeled CD19, clone SJ25C1 and APC-Cy7-labeled CD8, clone SK1) and with BD Multitest™ CD8-FITC (clone SK1)/CD38-PE (clone HB7)/CD3-PerCP (clone SK7)/HLA-DR-APC (clone L343) was performed to enumerate *ex vivo* the absolute counts of T and NK cells populations and activated T CD3<sup>+</sup>CD8<sup>+</sup> or CD3<sup>+</sup>CD8<sup>-</sup> cells co-expressing HLA-DR and CD38 in BD Trucount™ tubes with a Lyse/No Wash procedure, avoiding any bias induced by centrifugation steps. Cells were acquired on BD FACSCanto™ II flow cytometer. The paired non-parametric Wilcoxon signed rank test was used to compare the immuno-monitoring results obtained at the different time points to the pre-treatment baseline using JMP® version 12 software.

### Suppl. Figure 1 legend

*Suppl. Figure 1: Combined treatment effect of T/NK cells compartment.*

Absolute counts of circulating CD45<sup>+</sup> CD3<sup>+</sup> (T cell), CD45<sup>+</sup> CD3<sup>+</sup> CD4<sup>+</sup> (CD4 T cell), CD45<sup>+</sup> CD3<sup>+</sup> CD8<sup>+</sup> (CD8 T cell), CD3<sup>+</sup> CD8<sup>+</sup> HLA-DR<sup>+</sup> CD38<sup>+</sup> (Activated CD8 T cells), CD3<sup>+</sup> CD8<sup>-</sup> HLA-DR<sup>+</sup> CD38<sup>+</sup> (Activated CD4 T cells) in blood samples collected pre-dosing at the start of combined therapy (Cycle 1), at Cycle 5, Cycle 9 and Cycle 13 (for part B only) are shown for each dosing group in Part A and in Part B (top panels). Relative fold changes from the baseline calculated for all cell population are shown (bottom panels) Significant changes assessed by paired non-parametric Wilcoxon signed rank test are displayed with a horizontal bar ( $p < 0.05$ ).
