# Supplementary figures and images for: Eftilagimod alpha, a soluble lymphocyte activation gene-3 (LAG-3) protein plus pembrolizumab in patients with metastatic melanoma
Source: PubMed Central journal article supplement — J Immunother Cancer. 2020 Nov 20;8(2):e001681. doi: 10.1136/jitc-2020-001681 (PMC7682474; doi:10.1136/jitc-2020-001681), 2020-11-20

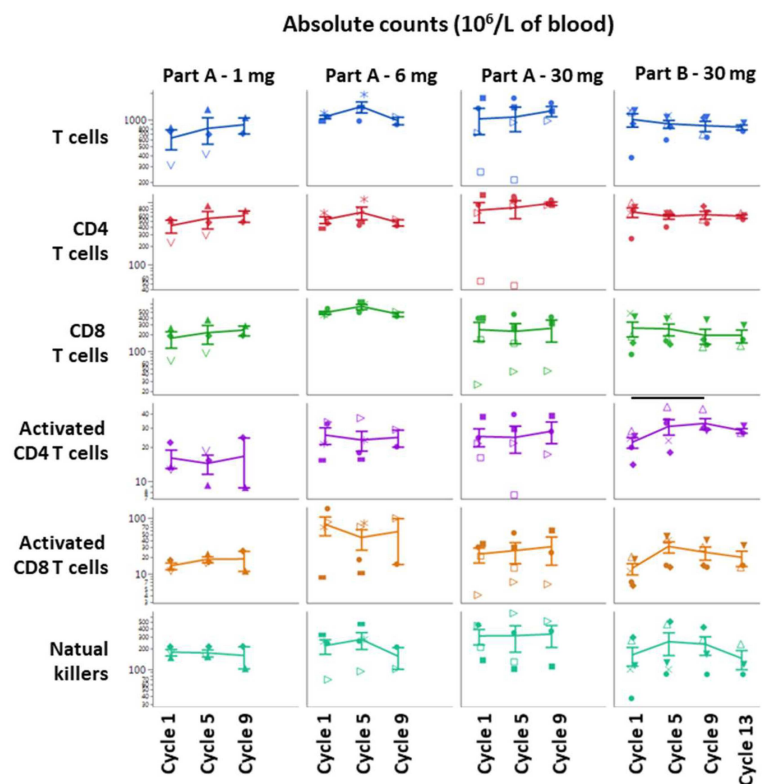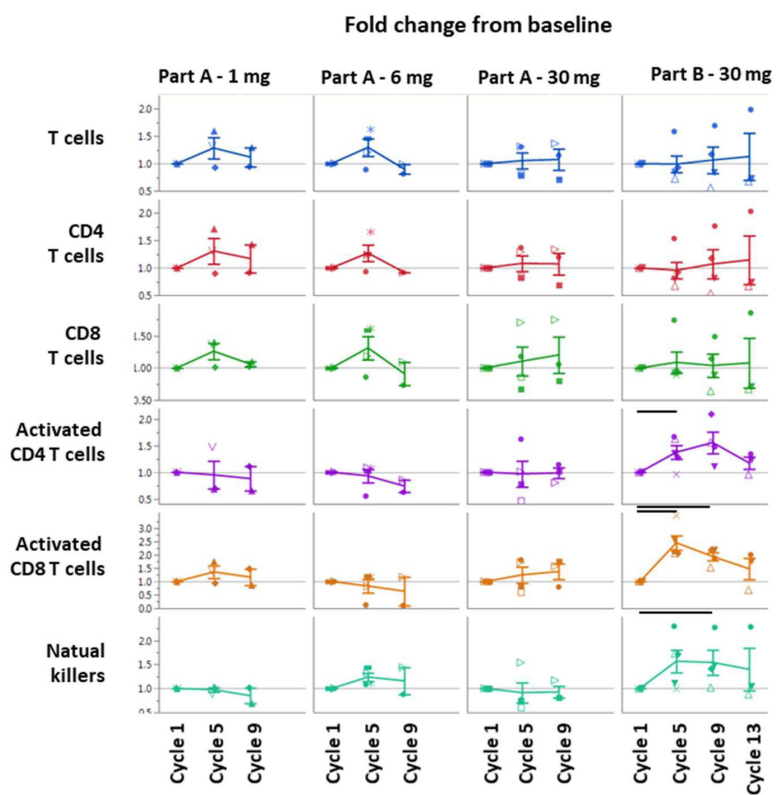

Supplement: jitc-2020-001681supp001.pdf [file jitc-2020-001681supp001.pdf]
